# Supplementary material for: Elevated levels of endothelial-derived microparticles and serum CXCL9 and SCGF-β are associated with unstable asymptomatic carotid plaques.
Source: Springer Nature journal article supplement (doi:10.1038/srep16658), 2015-11-13
Supplement: 41598_2015_BFsrep16658_MOESM1_ESM.pdf [file 41598_2015_BFsrep16658_MOESM1_ESM.pdf]

## Elevated levels of endothelial-derived microparticles and serum CXCL9 and SCGF- $\beta$ are associated with unstable asymptomatic carotid plaques.

+A.Schiro MRCS<sup>1,2</sup>, +F.L. Wilkinson PhD<sup>3</sup>, R Weston PhD<sup>3</sup>, J.V. Smyth FRCS<sup>1</sup>, F. Serracino-Ingloft, FRCS<sup>1,2,3</sup>, \*M.Y. Alexander PhD<sup>2,3</sup>.

<sup>1</sup>Regional Vascular and Endovascular Unit, Manchester Royal Infirmary, Central Manchester University Hospitals NHS Foundation Trust, Manchester Academic Health Science Centre, Oxford Road, Manchester, UK, M13 9WL.

<sup>2</sup> Institute of Cardiovascular Science, Manchester Academic Health Science Centre, University of Manchester, Core Technology Facility, 46 Grafton Street, Manchester, UK, M13 9NT.

<sup>3</sup>Translational Science, Healthcare Science Research Institute, Faculty of Science and Engineering, Manchester Metropolitan University, John Dalton Building, Chester Street, Manchester, UK, M1 5GD.

\*these authors contributed equally to this work

\* corresponding author; [Y.Alexander@mmu.ac.uk](mailto:Y.Alexander@mmu.ac.uk), Tel: +44161247542

### SUPPLEMENTARY MATERIAL

#### SUPPLEMENTARY TABLES

|                                      | <i>Asymptomatic</i><br>(n=19) | <i>Symptomatic</i><br>(n=51) | p Value |
|--------------------------------------|-------------------------------|------------------------------|---------|
| Age (average years) (Range)          | 67(48-87)                     | 70 (54-83)                   | 0.05    |
| Male                                 | 13 (68%)                      | 26 (51%)                     | 0.23    |
| Diabetes                             | 6 (32%)                       | 10 (20%)                     | 0.28    |
| Hypertension                         | 16 (84%)                      | 46 (90%)                     | 0.50    |
| Hypercholesterolemia                 | 15 (79%)                      | 43 (84%)                     | 0.56    |
| Coronary artery disease <sup>a</sup> | 4 (21%)                       | 23 (45%)                     | 0.07    |
| Renal Disease <sup>b</sup>           | 3 (16%)                       | 8 (16%)                      | 0.99    |
| Anti-platelet agent                  | 17 (89%)                      | 49 (96%)                     | 0.30    |
| Anti-hypertensive                    | 16 (84%)                      | 46 (90%)                     | 0.48    |
| Statin                               | 19 (100%)                     | 48 (94%)                     | 0.28    |
| Smoking                              | 13 (68%)                      | 22 (43%)                     | 0.06    |

#### Supplementary Table S1. Patient Demographics.

<sup>a</sup>Coronary disease defined as having a history of any of the following: arrhythmia, myocardial infarction, congestive heart failure, previous coronary revascularization (percutaneous or surgical) and angina. <sup>b</sup>Renal disease defined as patients with preoperative creatinine (pr-crt): 1.1 < pr-crt  $\leq$  2.4mg/dL or 2.5  $\leq$  pr-crt  $\leq$  5.9mg/dL.

| <i>Duplex categories</i> |     |        |        |
|--------------------------|-----|--------|--------|
| % ICA stenosis           | 50% | 50-70% | 70-99% |
| Asymptomatic             | 0   | 15     | 4      |
| Symptomatic              | 7   | 26     | 18     |

**Supplementary Table S2. Duplex ultrasonography categories.** The percentage internal carotid artery (ICA) stenosis in asymptomatic and symptomatic patients was determined by duplex ultrasonography.

**SUPPLEMENTARY FIGURES**

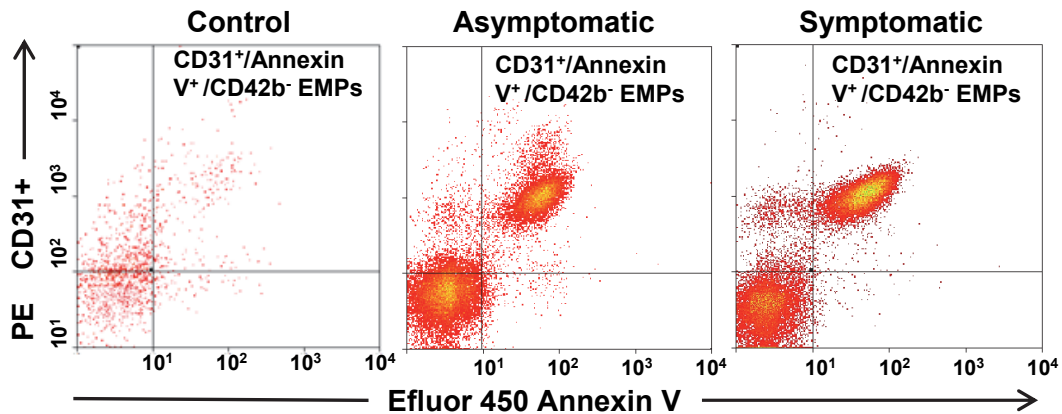

**Supplementary Figure S1. Enumeration of EMPs from patients with carotid artery disease.** Representative flow cytometry plots of each group. EMPs were defined as CD31<sup>+</sup>/AnnexinV<sup>+</sup>/CD42<sup>-</sup> and counted.

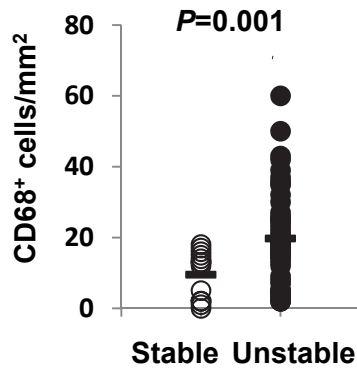

**Supplementary Figure S2. Number of CD68-positive cells per mm<sup>2</sup> of stable and unstable plaques.** Data were analysed using Mann-Whitney U statistical test. Bars represent the median.

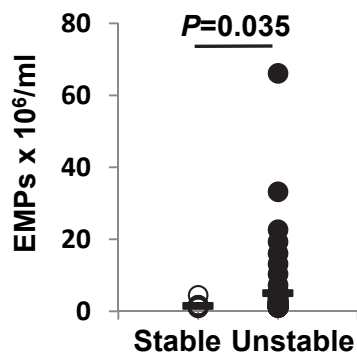

**Supplementary Figure S3. EMPs were significantly elevated in patients with unstable plaques compared to those with stable plaques, when both symptomatic and asymptomatic groups were combined.** Data were analysed using Mann-Whitney U statistical test. Bars represent the median.
